# Supplementary material
Source: PubMed Central journal article supplement (PMC4446704)
Supplement: NIHMS689990-supplement-Supp_Legends.pdf [file NIHMS689990-supplement-Supp_Legends.pdf]

## **SUPPLEMENTAL FIGURE LEGENDS**

### **Supplemental Figure S1. AKT inhibitors do not slow proliferation of MPNST cells**

90-8TL cells were treated with the rapamycin (Rap) at 100nM, Torin1 at 250nM or MK-2206 (concentration indicated). Bar graph represents the relative change in cell number from day 0 to 96 hours as compared to vehicle treated control cells. Data points show triplicate averages  $\pm$  SD. Immunoblots show pAKT T308, pAKT S473, pTSC2 T1462, pS6, and 4E-BP1 levels in the presence of the specified inhibitors. AKT, TSC2, S6, and actin serve as controls. \* indicates  $p < 0.0001$
