# Supplementary material
Source: PubMed Central journal article supplement (PMC4446704)
Supplement: NIHMS689990-supplement-Supp_Table_S1.pdf [file NIHMS689990-supplement-Supp_Table_S1.pdf]

Supplemental Table S1. Reported *in vitro* isoform specificities of PI3K inhibitors. The IC<sub>50</sub> (nM) reported in the literature for each PI3K inhibitor against Class IA catalytic isoforms in *in vitro* binding assays is shown. The source for each data set is listed. A66-(S) is termed a p110 $\alpha$ -specific inhibitor, AZD-6482 is classified as a p110 $\beta$ -specific inhibitor, and CAL-101 shows selectivity for p110 $\delta$ . GDC-0941 does not show significant isoform selectivity.

Reported *in vitro* IC<sub>50</sub> (nM)

| Drug     | p110 $\alpha$ | p110 $\beta$ | p110 $\delta$ | Source                |
|----------|---------------|--------------|---------------|-----------------------|
| A66-(S)  | 32            | >12500       | >1250         | Jamieson et. al. 2011 |
| AZD-6482 | 1200          | 21           | 80            | Nylander et. al. 2012 |
| CAL-101  | 820           | 565          | 2.5           | Lannutti et. al. 2010 |
| GDC-0941 | 3             | 33           | 3             | Folkes et. al. 2008   |
