# Supplementary material
Source: PubMed Central journal article supplement (PMC4446704)
Supplement: NIHMS689990-supplement-Supp_Table_S2.pdf [file NIHMS689990-supplement-Supp_Table_S2.pdf]

Supplemental Table S2. Two class comparison between combination treated samples and controls for the other GLUT proteins and hexokinases. The log<sub>2</sub> of fold (combination/control) expression for each gene in the GLUT and hexokinase family are shown, such that negative values indicate a decrease in the combination relative to control, and positive values represent an increase. The p-value for the difference in expression between classes is shown.

| Gene Name    | Gene Symbol    | Log <sub>2</sub> of Fold Change | P-value |
|--------------|----------------|---------------------------------|---------|
| Glut2        | <i>SLC2A2</i>  | -0.03                           | 0.73    |
| Glut3        | <i>SLC2A3</i>  | -0.07                           | 0.78    |
| Glut4        | <i>SLC2A4</i>  | -0.03                           | 0.87    |
| Glut5        | <i>SLC2A5</i>  | 0.15                            | 0.51    |
| Glut6        | <i>SLC2A6</i>  | -0.01                           | 0.97    |
| Glut7        | <i>SLC2A7</i>  | 0.06                            | 0.58    |
| Glut8        | <i>SLC2A8</i>  | 0.14                            | 0.15    |
| Glut9        | <i>SLC2A9</i>  | 0.14                            | 0.30    |
| Glut10       | <i>SLC2A10</i> | 0.43                            | 0.48    |
| Glut12       | <i>SLC2A12</i> | -0.12                           | 0.59    |
| Glut13       | <i>SLC2A13</i> | -0.23                           | 0.42    |
| Hexokinase 1 | <i>HK1</i>     | -0.03                           | 0.87    |
| Hexokinase 2 | <i>HK2</i>     | -0.16                           | 0.49    |
| Hexokinase 3 | <i>HK3</i>     | -0.12                           | 0.48    |
