# Supplementary material
Source: PubMed Central journal article supplement (PMC4446704)

# Supplemental Figure S1.

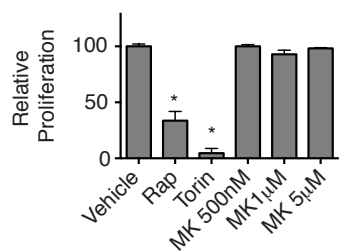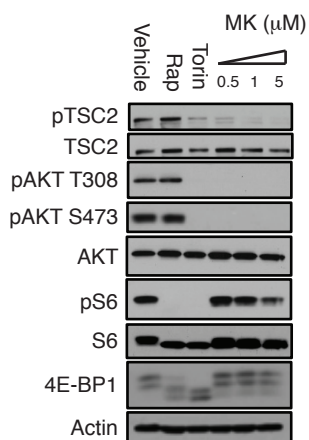

Supplement: NIHMS689990-supplement-Supp_Fig_S1.pdf [file NIHMS689990-supplement-Supp_Fig_S1.pdf]
